# Supplementary material
Source: publisher figshare collection journal article supplement (https://tandf.figshare.com/ndownloader/files/25468427)
Supplement: Supplementary file 1 [file 25468427]

**Appendix 3.** The significance of the rank order of the themes as generated by the perceived *benefit* rating data (participant groups combined) were examined using independent t-tests, with Bonferroni corrected *p-values* below 0.0023 indicating significance. Significant values are in bold type.

| Themes | Facilitating peer and other professional support  (mean 3.31; SD 0.97) | Including communication partners  (mean 3.54; SD 0.94) | Improving social engagement with technology  (mean 3.75; SD 0.76) | Use of strategies and training to personalising the rehabilitation program  (mean 3.86; SD 0.73) | Client empowerment (3.89; SD 0.83) | Promoting client responsibility  (mean 3.97; SD 0.73) |
| --- | --- | --- | --- | --- | --- | --- |
| Including communication partners  (mean 3.54; SD 0.94) | 0.167 |  |  |  |  |  |
| Improving social engagement with technology  (mean 3.75; SD 0.76) | 0.004 | 0.149 |  |  |  |  |
| Use of strategies and training to personalising the rehabilitation program  (mean 3.86; SD 0.73) | **<0.001** | 0.026 | 0.382 |  |  |  |
| Client Empowerment  (mean 3.89; SD 0.83) | **<0.001** | 0.021 | 0.304 | 0.832 |  |  |
| Promoting client responsibility  (mean 3.97; SD 0.73) | **<0.001** | **0.002** | 0.071 | 0.339 | 0.495 |  |
| Providing emotional support  (mean 4.02; SD 0.67) | **<0.001** | **0.001** | 0.027 | 0.177 | 0.299 | 0.717 |
